# Supplementary material for: Deutsche Universitäten machen Ergebnisse klinischer Arzneimittelstudien unzureichend öffentlich – Das sollte sich ändern
Source: Springer Nature journal article supplement (doi:10.1007/s00103-020-03246-0), 2020-11-11

Elektronisches Zusatzmaterial zum Beitrag:

## **Deutsche Universitäten machen Ergebnisse klinischer Arzneimittelstudien unzureichend öffentlich – Das sollte sich ändern.**

Peter Grabitz<sup>1</sup>, Till Brückner<sup>1,2</sup>, Daniel Strech<sup>1</sup>

<sup>1</sup> QUEST Center for Transforming Biomedical Research, Berlin Institute of Health (BIH), Charité - Universitätsmedizin Berlin, Berlin, Deutschland

<sup>2</sup> TranspariMED, Bristol, UK

### **Korrespondenzautor:**

Peter Grabitz,  
QUEST-Center, Berlin Institute of Health (BIH),  
Charité-Universitätsmedizin Berlin,  
Anna-Louisa-Karsch-Str. 2,  
10178 Berlin, Deutschland  
[peter.grabitz@charite.de](mailto:peter.grabitz@charite.de)

Inhalt:

**Abb. Z1:** Relativer Anteil veröffentlichter Ergebnisreports für klinische Prüfungen in PharmNet.Bund pro Universitätsklinikum. Quelle: Eigene Recherche im Februar 2019

**Abb. Z2:** Anzahl veröffentlichter und nicht veröffentlichter Ergebnisreports von klinischen Prüfungen in PharmNet.Bund pro Universitätsklinikum. Quelle: Eigene Recherche im Februar 2019

**Abb. Z1:** Relativer Anteil veröffentlichter Ergebnisreports für klinische Prüfungen in PharmNet.Bund pro Universitätsklinikum. Quelle: Eigene Recherche im Februar 2019

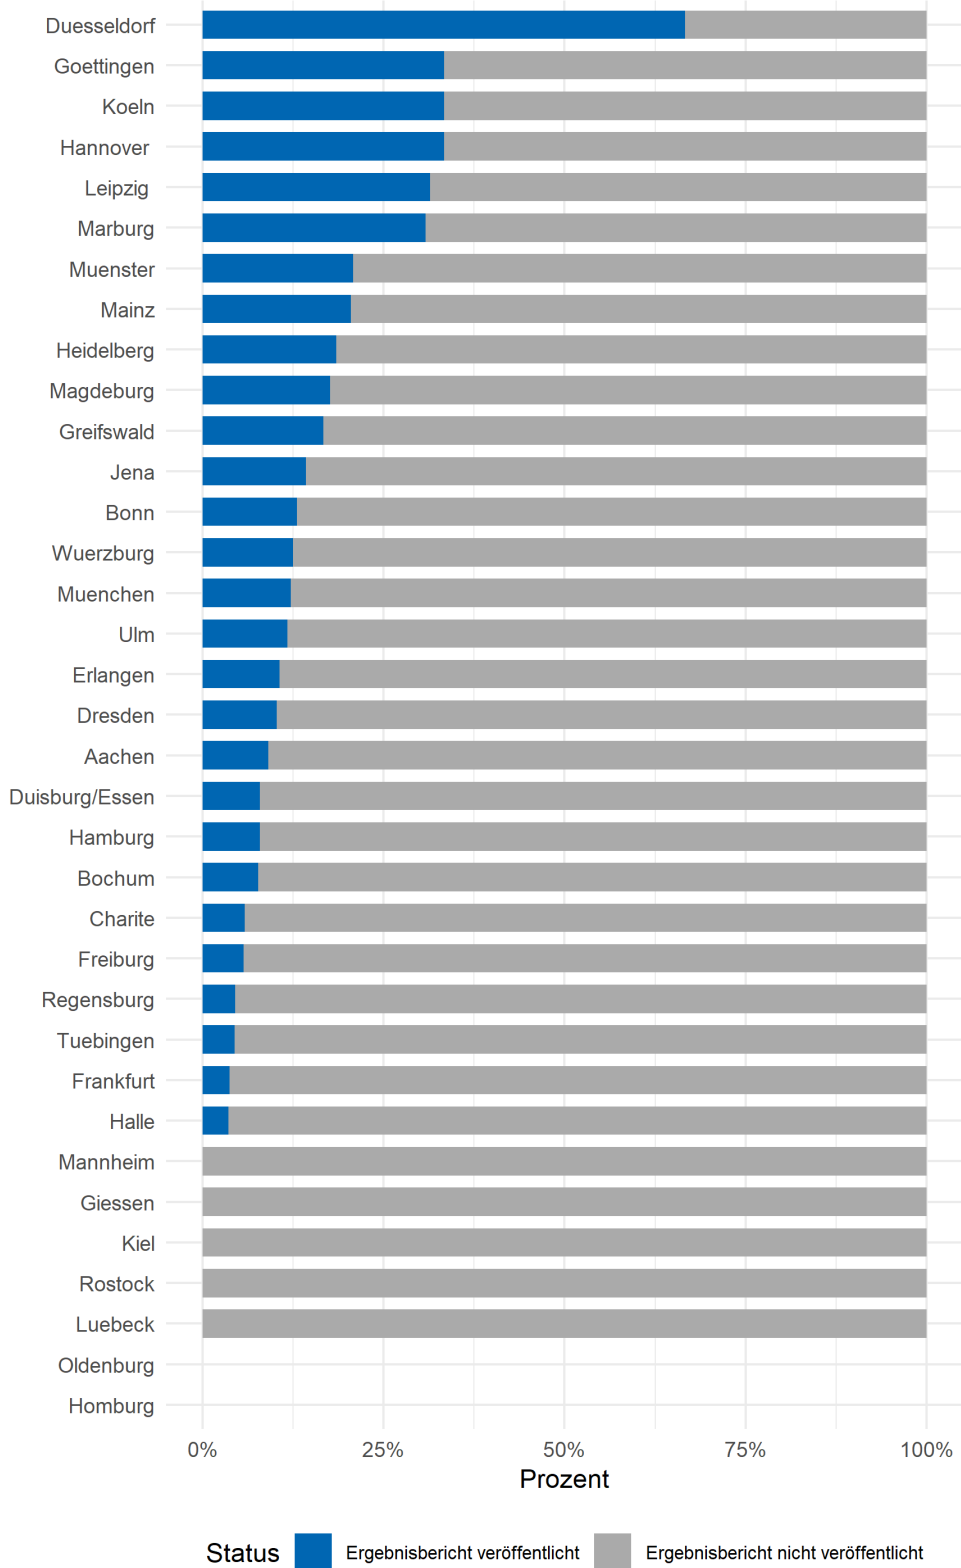

**Abb. Z2:** Anzahl veröffentlichter und nicht veröffentlichter Ergebnisreports von klinischen Prüfungen in PharmNet.Bund pro Universitätsklinikum. Quelle: Eigene Recherche im Februar 2019

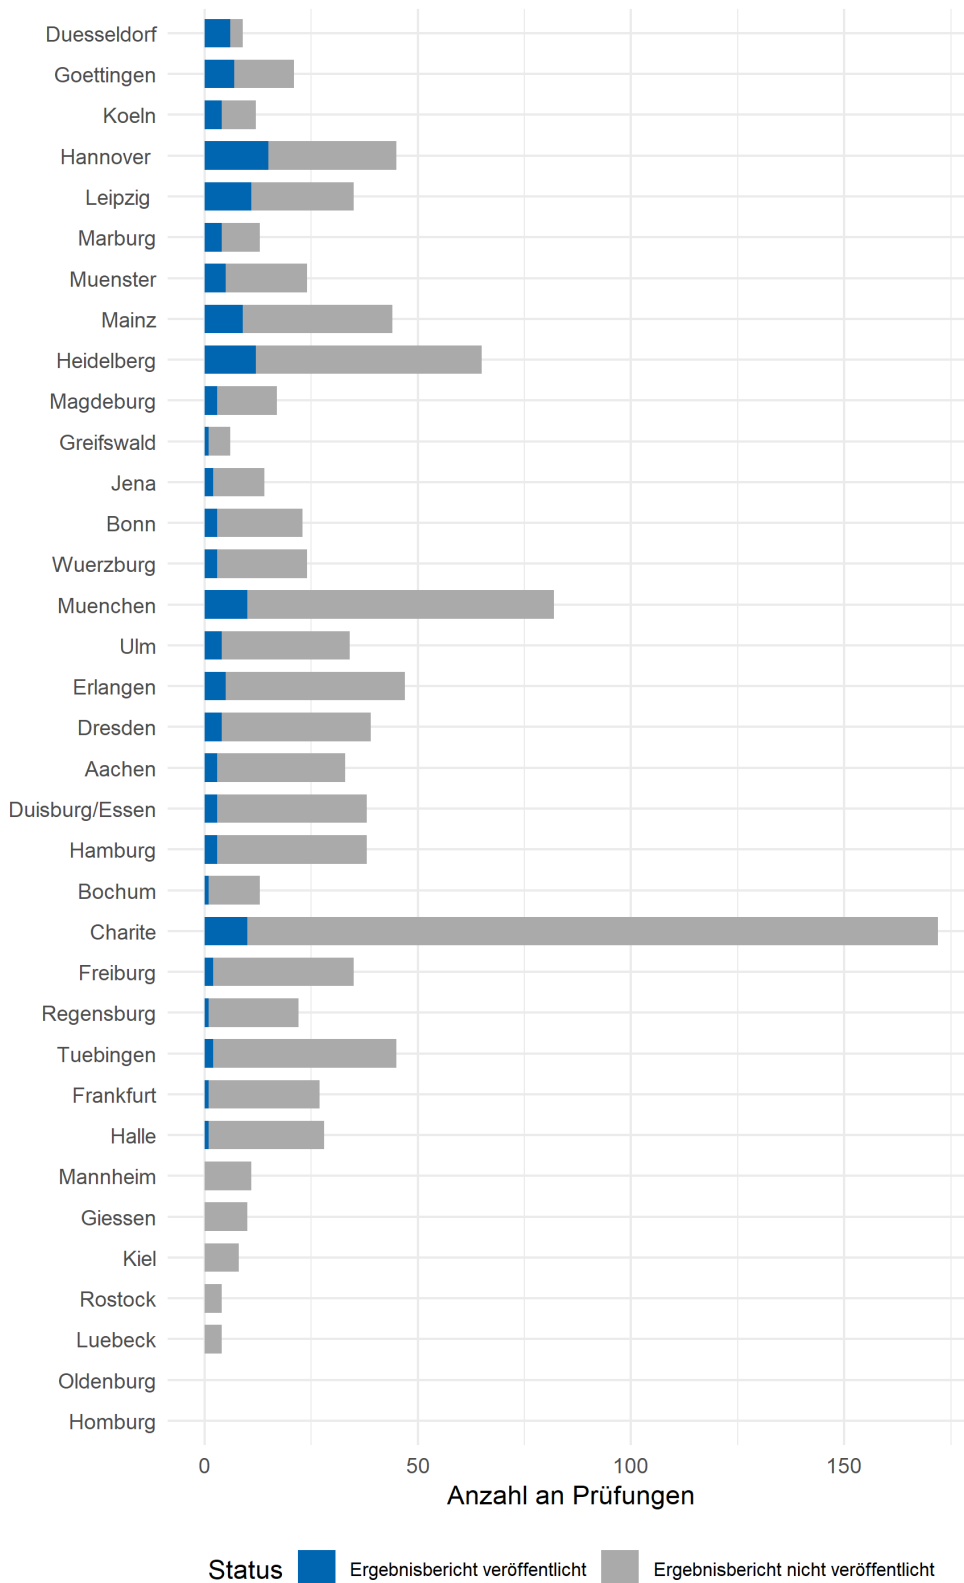

Supplement: MOESM1 [file 18576612]
